# Supplementary material for: Quantifying the heritability of glioma using genome-wide complex trait analysis
Source: PubMed Central journal article supplement (PMC4667278; doi:10.1038/srep17267), 2015-12-02
Supplement: srep17267-s1.pdf [file srep17267-s1.pdf]

## **SUPPLEMENTARY INFORMATION**

### **Quantifying the heritability of glioma using genome-wide complex trait analysis**

Ben Kinnersely, Jonathan S Mitchell, Konstantinos Gousias, Johannes Schramm, Ahmed Idbaih, Marianne Labussière, Yannick Marie, Amythis Rahimian, H.-Erich Wichmann, Stefan Schreiber, Khe Hoang-Xuan, Jean-Yves Delattre, Markus M. Nöthen, Karima Mokhtari, Mark Lathrop, Melissa Bondy, Matthias Simon, Marc Sanson, Richard S Houlston

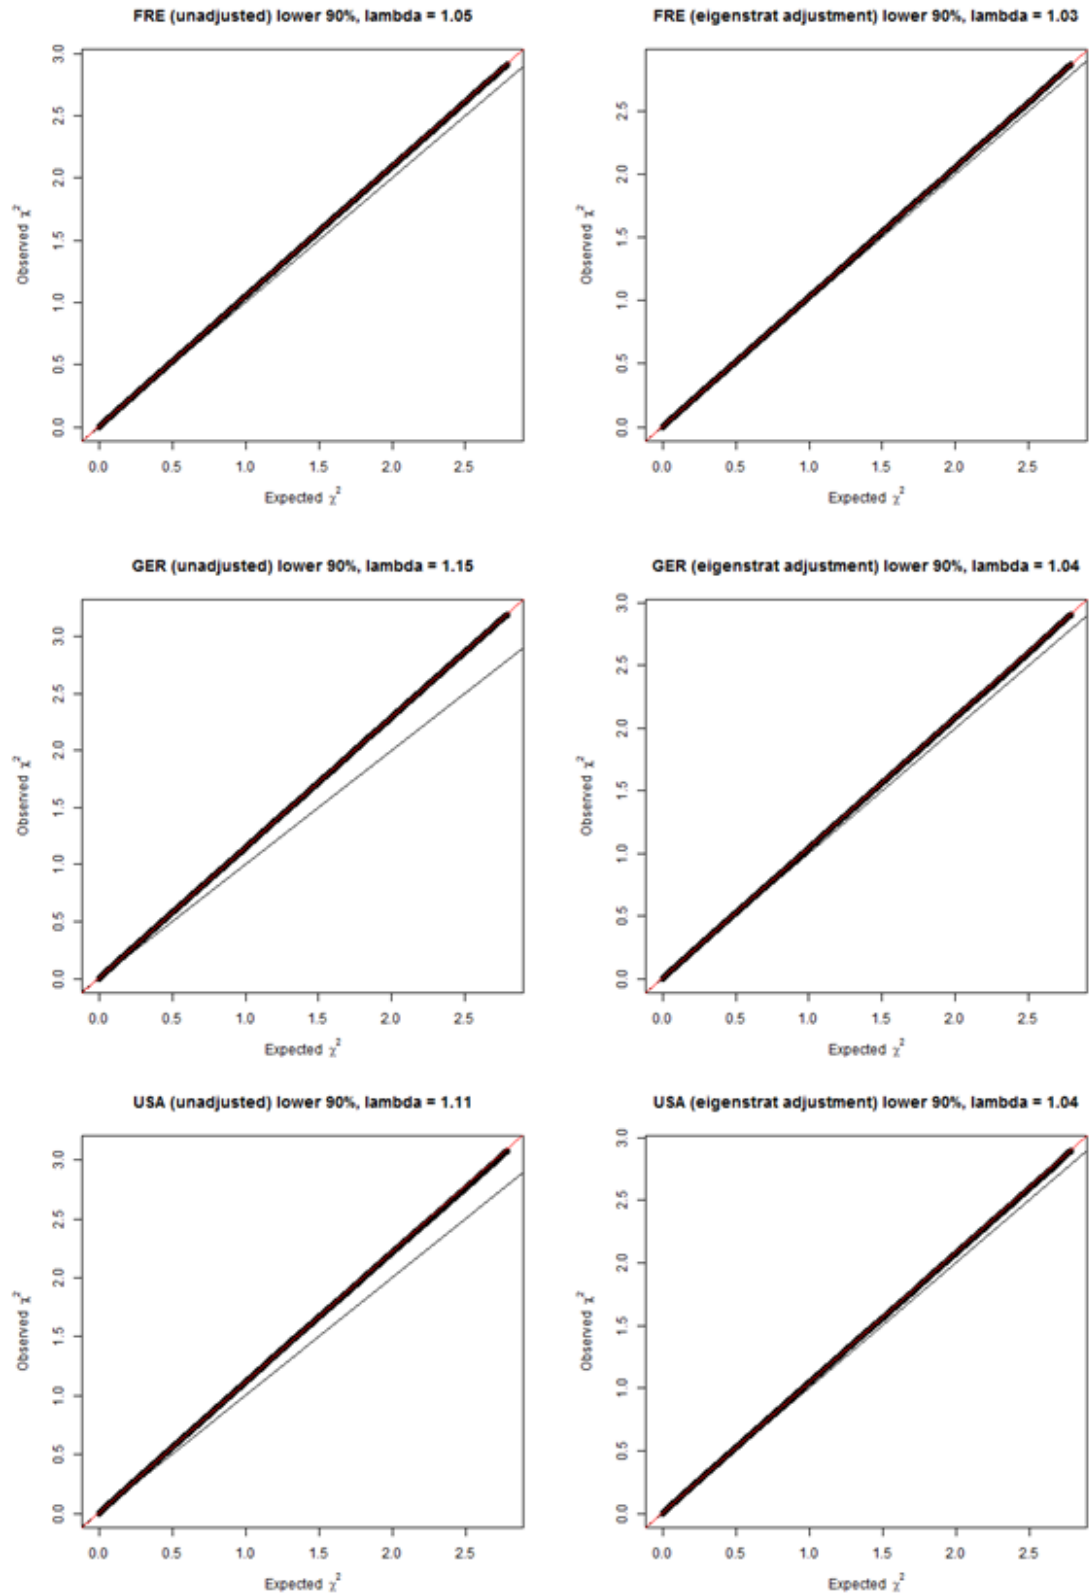

**Supplementary Figure 1: Q-Q plot of test statistics ( $\chi^2$ ) for association with glioma.** The black line represents the null hypothesis of no association. FRE, French GWAS; GER, German GWAS; USA, USA GWAS.

| <b>GWAS dataset</b>            | <b>French</b>   | <b>German</b>                          | <b>USA</b>                        |
|--------------------------------|-----------------|----------------------------------------|-----------------------------------|
| <b>Cases<br/>(GBM/non-GBM)</b> | 1,423 (430/993) | 846 (431/415)                          | 1,247 (652/595)                   |
| Study or Centre                | Paris           | Bonn                                   | MD Anderson                       |
| Average age                    | 48              | 51                                     | 47                                |
| Male/Female                    | 816/607         | 474/372                                | 771/476                           |
| Illumina Chip                  | HumanHap 660    | HumanHap 660                           | HumanHap 610 Quad                 |
| <b>Controls</b>                | 1,190           | 1,310                                  | 2,236                             |
| Study                          | SU.VI.MAX       | KORA, POPGEN & Heinz<br>Nixdorf Recall | CGEMs                             |
| Illumina Chip                  | HumanHap 660    | HumanHap 550                           | HumanHap 240+300;<br>HumanHap 500 |

**Supplementary Table 1: Summary characteristics of the three GWAS datasets.** Sample numbers are post-QC (as described previously<sup>1,2</sup>)

| <b>GWAS dataset</b>         | <b>French</b>  | <b>German</b>  | <b>USA</b>     |
|-----------------------------|----------------|----------------|----------------|
| Starting SNPs               | 425,190        | 425,190        | 425,190        |
| <b>Exclusions</b>           |                |                |                |
| $P_{HWE} < 0.05$            | 62,065         | 63,429         | 60,932         |
| $P_{missing} < 0.05$        | 25,002         | 60,235         | 43,364         |
| <b>Consistent final set</b> | <b>263,905</b> | <b>263,905</b> | <b>263,905</b> |

**Supplementary Table 2: SNP quality control for GCTA.** HWE, Hardy Weinberg equilibrium.

$P_{missing}$  is a per-SNP test for significant differences in missing data between cases and controls.

| <b>All glioma</b>                 |                                                 |                       |
|-----------------------------------|-------------------------------------------------|-----------------------|
| <b>Study</b>                      | <b><math>h^2</math> (<math>\pm</math> S.E.)</b> | <b><i>P</i></b>       |
| <b>France</b>                     | 0.14 ( $\pm$ 0.08)                              |                       |
| <b>Germany</b>                    | 0.36 ( $\pm$ 0.10)                              |                       |
| <b>USA</b>                        | 0.25 ( $\pm$ 0.06)                              |                       |
| <b>Combined</b>                   | 0.24 ( $\pm$ 0.04)                              | 6.42x10 <sup>-8</sup> |
| <b><math>I^2 / P_{het}</math></b> |                                                 | 37.5%/0.20            |

**Supplementary Table 3: PCGC heritability estimates.** S.E., standard errors.

| Chromosome | Size (bp)   | $h^2$ ( $\pm$ S.E.)    |
|------------|-------------|------------------------|
| 1          | 247,199,719 | 0.0095 ( $\pm$ 0.0085) |
| 2          | 242,751,149 | 0.028 ( $\pm$ 0.0086)  |
| 3          | 199,446,827 | 0.011 ( $\pm$ 0.0079)  |
| 4          | 191,263,063 | 0.014 ( $\pm$ 0.0077)  |
| 5          | 180,837,866 | 0.013 ( $\pm$ 0.0075)  |
| 6          | 170,896,993 | 0.0092 ( $\pm$ 0.0075) |
| 7          | 158,821,424 | 0.0057 ( $\pm$ 0.0070) |
| 8          | 146,274,826 | 0.027 ( $\pm$ 0.0074)  |
| 9          | 140,442,298 | 0.015 ( $\pm$ 0.0068)  |
| 10         | 135,374,737 | 0.016 ( $\pm$ 0.0071)  |
| 11         | 134,452,384 | 0.010 ( $\pm$ 0.0067)  |
| 12         | 132,289,534 | 0.0092 ( $\pm$ 0.0067) |
| 13         | 114,127,980 | 0.012 ( $\pm$ 0.0060)  |
| 14         | 106,360,585 | 0.0060 ( $\pm$ 0.0057) |
| 15         | 100,338,915 | 0.011 ( $\pm$ 0.055)   |
| 16         | 88,822,254  | 0.0089 ( $\pm$ 0.0058) |
| 17         | 78,654,742  | 0.0087 ( $\pm$ 0.0056) |
| 18         | 76,117,153  | 0.0059 ( $\pm$ 0.0053) |
| 19         | 63,806,651  | 0.0086 ( $\pm$ 0.0049) |
| 20         | 62,435,965  | 0.0065 ( $\pm$ 0.0053) |
| 21         | 46,944,323  | 0.0074 ( $\pm$ 0.0041) |
| 22         | 49,528,953  | 0.0038 ( $\pm$ 0.0040) |
| Total      |             | 0.25 ( $\pm$ 0.031)    |

**Supplementary Table 4: Estimates of the variance explained by individual chromosomes.**  
S.E., standard error.

| Group | Category                 | N (SNPs) | $h^2$ ( $\pm$ S.E.)  |
|-------|--------------------------|----------|----------------------|
| 1     | Within gene              | 124,824  | 0.13 ( $\pm$ 0.023)  |
|       | Outside gene             | 138,814  | 0.12 ( $\pm$ 0.024)  |
| 2     | Conserved (GERP > 2)     | 27,982   | 0.041 ( $\pm$ 0.020) |
|       | Not conserved (GERP < 2) | 232,727  | 0.21 ( $\pm$ 0.034)  |
| 3     | CADD score > 10          | 26,511   | 0.015 ( $\pm$ 0.020) |
|       | CADD score < 10          | 237,126  | 0.24 ( $\pm$ 0.033)  |
| 4     | Tfbs occupied            | 5,815    | 0.016 ( $\pm$ 0.010) |
|       | Tfbs unoccupied          | 257,823  | 0.24 ( $\pm$ 0.031)  |

**Supplementary Table 5: Heritability estimates for different functional characteristics of SNPs.**

CADD, combined annotated dependent depletion; GERP, genomic evolutionary rate profiling; Tfbs, transcription factor binding site. S.E., standard error. The enrichment statistic details the relative contribution to heritability within the group after adjusting for SNP number.
